# Supplementary material for: Regulation of nuclear–cytoplasmic shuttling and function of Family with sequence similarity 13, member A (Fam13a), by B56-containing PP2As and Akt
Source: PubMed Central journal article supplement — Mol Biol Cell. 2015 Mar 15;26(6):1160–73. doi: 10.1091/mbc.E14-08-1276 (PMC4357514; doi:10.1091/mbc.e14-08-1276), 2015-03-15

# Supplemental Materials

*Molecular Biology of the Cell*

Jin et al.

## Supplemental Figure Legends

**Supplemental Figure 1. Sequence alignment of Fam13a across species.** Residues of the 14-3-3 binding motifs and nuclear localization signals are highlighted in blue and red boxes, respectively. The sequence of the B56-binding domain is underlined in green.

**Supplemental Figure 2. Leptomycin B (LMB) blocks OA-induced cytoplasmic sequestration of Fam13a.** Representative immunofluorescence images showing subcellular distribution of Fam13a in control (DMSO), LMB-, OA-, and OA+LMB-treated NIH3T3 cells. Fam13a was primarily nuclear in control (DMSO) and LMB-treated NIH3T3 cells. OA treatment induced cytoplasmic sequestration of Fam13a. LMB treatment blocked OA-induced cytoplasmic sequestration of Fam13a. The graph on the right shows the percentage of cells displaying nuclear (N), cytoplasmic (C), or even distribution between nucleus and cytoplasm (N=C).

**Supplemental Figure 3. Specificity of the anti-Fam13a antibody.** **A.** Western blot showing that overexpressed myc-Fam13a could be recognized by the anti-myc and anti-Fam13a antibodies on Western blot. **B.** Western blot showing detection of endogenous Fam13a in A549 cells by the anti-Fam13a antibody. Note that transfection of a siRNA against FAM13A (siFam13a) reduced the amount of endogenous Fam13a in A549 cells.

**Supplemental Figure 4. The motif between residues 404 and 418 of Fam13a is a 14-3-3 binding motif.** The left panel is a CoIP experiment, showing that mutation of the 14-3-3 binding domain located between 404-418 ( $\Delta$ 315-329; T411A) abolished the weak binding between  $\Delta$ 315-329 and 14-3-3. The right panel is a GST-pull down assay, showing that bacterially expressed GST-14-3-3 $\eta$  could pull down the wild type Fam13a, a small amount of  $\Delta$ 315-329, but not  $\Delta$ 315-329; T411A.

# Supplemental figure 1

|           |     |      |      |       |      |       |       |       |        |       |       |       |       |       |      |      |      |        |       |        |      |     |      |     |     |     |   |   |     |   |   |     |   |   |   |   |   |   |   |   |   |   |   |   |   |   |   |   |     |   |   |     |
|-----------|-----|------|------|-------|------|-------|-------|-------|--------|-------|-------|-------|-------|-------|------|------|------|--------|-------|--------|------|-----|------|-----|-----|-----|---|---|-----|---|---|-----|---|---|---|---|---|---|---|---|---|---|---|---|---|---|---|---|-----|---|---|-----|
| mouse     | 284 | PMLS | PRFY | YAGQ  | SRQY | LDDT  | EVPP  | SPPN  | SHSFM  | -RRR  | SSSL  | GSYD  | DEQ-  | EDLT  | PVQL | TRR  | 341  |        |       |        |      |     |      |     |     |     |   |   |     |   |   |     |   |   |   |   |   |   |   |   |   |   |   |   |   |   |   |   |     |   |   |     |
| rat       |     | PMLS | PRFY | YAGQ  | SRQY | LDDT  | EVPP  | SPPN  | SHSFM  | -RRR  | SSSL  | GSYD  | DEQ-  | EDLT  | PVQL | TRR  |      |        |       |        |      |     |      |     |     |     |   |   |     |   |   |     |   |   |   |   |   |   |   |   |   |   |   |   |   |   |   |   |     |   |   |     |
| human     |     | PMLS | PRFY | YAGQ  | SRQY | LDDT  | EVPP  | SPPN  | SHSFM  | -RRR  | SSSL  | GSYD  | DEQ-  | EDLT  | PAQL | TRR  |      |        |       |        |      |     |      |     |     |     |   |   |     |   |   |     |   |   |   |   |   |   |   |   |   |   |   |   |   |   |   |   |     |   |   |     |
| chicken   |     | PMLS | PRFY | YAGQ  | SQQY | LDDT  | EVPP  | SPPN  | SHSFM  | -RRR  | SSSL  | GSYED | DDR-  | EDLT  | PAQL | TRR  |      |        |       |        |      |     |      |     |     |     |   |   |     |   |   |     |   |   |   |   |   |   |   |   |   |   |   |   |   |   |   |   |     |   |   |     |
| xenopus   |     | PMLS | PRFY | YAGHS | QQY  | LDDP  | EVPP  | SPPN  | NAHSFM | -RRR  | SSSL  | GSHEE | DRDE  | EDLT  | PAQL | TRK  |      |        |       |        |      |     |      |     |     |     |   |   |     |   |   |     |   |   |   |   |   |   |   |   |   |   |   |   |   |   |   |   |     |   |   |     |
| zebrafish |     | PMV  | SPRF | YG    | DGHQ | YLDD  | TEVPP | SPPN  | AHSFV  | SRRR  | SSSL  | GSCE  | DER-  | EELT  | SAQL | SKR  |      |        |       |        |      |     |      |     |     |     |   |   |     |   |   |     |   |   |   |   |   |   |   |   |   |   |   |   |   |   |   |   |     |   |   |     |
| mouse     | 342 | IQT  | LKKK | IRKF  | EDR  | FEEER | KYR   | PSHS  | SDKA   | ANPE  | VLK   | WTND  | LAK   | FRK   | QLK  | ESKL | KI   | SEEDL  | 401   |        |      |     |      |     |     |     |   |   |     |   |   |     |   |   |   |   |   |   |   |   |   |   |   |   |   |   |   |   |     |   |   |     |
| rat       |     | IQT  | LKKK | IRKF  | EDR  | FEEER | KYR   | PSHS  | SDKA   | ANPE  | VLK   | WTND  | LAK   | FRK   | QLK  | ETKL | KI   | SEEDL  |       |        |      |     |      |     |     |     |   |   |     |   |   |     |   |   |   |   |   |   |   |   |   |   |   |   |   |   |   |   |     |   |   |     |
| human     |     | IQSL | LKKK | IRKF  | EDR  | FEEEK | KYR   | PSHS  | SDKA   | ANPE  | VLK   | WTND  | LAK   | FR    | RQL  | ESKL | KI   | SEEDL  |       |        |      |     |      |     |     |     |   |   |     |   |   |     |   |   |   |   |   |   |   |   |   |   |   |   |   |   |   |   |     |   |   |     |
| chicken   |     | IQGL | LKKK | IRKF  | EDK  | FEEER | KYR   | PSHS  | SDKA   | ANPE  | VLK   | WTND  | LAK   | FRK   | QLK  | ESKL | KI   | SEEDL  |       |        |      |     |      |     |     |     |   |   |     |   |   |     |   |   |   |   |   |   |   |   |   |   |   |   |   |   |   |   |     |   |   |     |
| xenopus   |     | IQSL | LKKK | IRKF  | EDK  | FEEER | KYR   | PSHR  | DKA    | TNPE  | VLK   | WMN   | ELAK  | FRK   | QLK  | ETKI | KL   | SEDDL  |       |        |      |     |      |     |     |     |   |   |     |   |   |     |   |   |   |   |   |   |   |   |   |   |   |   |   |   |   |   |     |   |   |     |
| zebrafish |     | IHL  | LKKK | IRRY  | EK   | FEEER | KYR   | PSHG  | DKA    | GNPE  | VLRW  | MNEL  | TRL   | RKD   | LKD  | HKL  | LK   | SEEDL  |       |        |      |     |      |     |     |     |   |   |     |   |   |     |   |   |   |   |   |   |   |   |   |   |   |   |   |   |   |   |     |   |   |     |
| mouse     | 402 | TPR  | TRQ  | RSNT  | LPKS | FGS   | QLE   | KEDE  | KKQ    | ELLD  | KAIR  | PSVE  | ATLE  | GIL   | RKL  | QEK  | RVE  | SSRPE  | 461   |        |      |     |      |     |     |     |   |   |     |   |   |     |   |   |   |   |   |   |   |   |   |   |   |   |   |   |   |   |     |   |   |     |
| rat       |     | TPR  | TRQ  | RSNT  | LPKS | FGS   | QLE   | KEDE  | KKQ    | ELVD  | KAIR  | PSVE  | ATLE  | GIL   | RKL  | QEK  | RM   | ESSRPE |       |        |      |     |      |     |     |     |   |   |     |   |   |     |   |   |   |   |   |   |   |   |   |   |   |   |   |   |   |   |     |   |   |     |
| human     |     | TPR  | MRQ  | RSNT  | LPKS | FGS   | QLE   | KEDE  | KKQ    | ELVD  | KAI   | KPSVE | ATLES | IQR   | KLQ  | EK   | RAE  | SSRPE  |       |        |      |     |      |     |     |     |   |   |     |   |   |     |   |   |   |   |   |   |   |   |   |   |   |   |   |   |   |   |     |   |   |     |
| chicken   |     | GPV  | VRQ  | RSNT  | LPKS | FGS   | QLE   | KEDE  | DKQ    | DLSD  | KA    | PAVE  | VTLD  | SIQ   | KKL  | QEK  | RTET | NRPE   |       |        |      |     |      |     |     |     |   |   |     |   |   |     |   |   |   |   |   |   |   |   |   |   |   |   |   |   |   |   |     |   |   |     |
| xenopus   |     | VPQ  | MRQ  | RSNT  | LPKS | FGS   | QLD   | REEE  | KKP    | PETVE | KPA   | KSME  | ATME  | AIQ   | KKL  | QEK  | RNE  | VNRPE  |       |        |      |     |      |     |     |     |   |   |     |   |   |     |   |   |   |   |   |   |   |   |   |   |   |   |   |   |   |   |     |   |   |     |
| zebrafish |     | TP   | IPR  | Q     | RSNT | LPKS  | FGS   | QLE   | KKTP   | PET   | ----  | KAP   | KPP   | VE    | STLE | TVTN | KLQ  | EKRKE  | AGRPE |        |      |     |      |     |     |     |   |   |     |   |   |     |   |   |   |   |   |   |   |   |   |   |   |   |   |   |   |   |     |   |   |     |
| mouse     |     | DIK  | DMTK | DQ    | IANE | KVAL  | QKAL  | LYYES | IHGR   | PVT   | KT    | TERQ  | IMK   | PLY   | DRY  | RLV  | KQIL | SR     | ASTV  | 521    |      |     |      |     |     |     |   |   |     |   |   |     |   |   |   |   |   |   |   |   |   |   |   |   |   |   |   |   |     |   |   |     |
| rat       |     | DIK  | DMTK | DQ    | IANE | KVAL  | QKAL  | LYYES | IHGR   | PVT   | KT    | TERQ  | IMK   | PLY   | DRY  | RLV  | KQIL | SR     | ASTV  |        |      |     |      |     |     |     |   |   |     |   |   |     |   |   |   |   |   |   |   |   |   |   |   |   |   |   |   |   |     |   |   |     |
| human     |     | DIK  | DMTK | DQ    | IANE | KVAL  | QKAL  | LYYES | IHGR   | PVT   | KNERQ | VMK   | PLY   | DRY   | RLV  | KQIL | SR   | ANTI   |       |        |      |     |      |     |     |     |   |   |     |   |   |     |   |   |   |   |   |   |   |   |   |   |   |   |   |   |   |   |     |   |   |     |
| chicken   |     | DIK  | DMTR | DQ    | IAAE | KVAL  | QKAL  | LYYES | IHGR   | PVT   | KNERQ | VMK   | PLY   | DRY   | RLV  | KQIL | SR   | ANTI   |       |        |      |     |      |     |     |     |   |   |     |   |   |     |   |   |   |   |   |   |   |   |   |   |   |   |   |   |   |   |     |   |   |     |
| xenopus   |     | DIK  | DMTR | DQ    | IAAE | KV    | SLQ   | KAL   | LYYES  | IHGR  | PVT   | KNERQ | VMK   | PLY   | DRY  | RLF  | KQIL | SR     | ANTI  |        |      |     |      |     |     |     |   |   |     |   |   |     |   |   |   |   |   |   |   |   |   |   |   |   |   |   |   |   |     |   |   |     |
| zebrafish |     | DIK  | DMT  | RE    | Q    | IGA   | EK    | VAI   | QKAL   | LYYES | IHGR  | P     | T     | KNERQ | VMK  | PLY  | DRY  | RLV    | KQIL  | CRASAI |      |     |      |     |     |     |   |   |     |   |   |     |   |   |   |   |   |   |   |   |   |   |   |   |   |   |   |   |     |   |   |     |
| mouse     | 522 | PI   | IGS  | PSS   | KRR  | SPSL  | QPI   | IE    | GETA   | SFF   | KEI   | IK    | ----  | QEE   | GSE  | DD   | SST  | KPDF   | AVTL  | KTD    | CS   | 577 |      |     |     |     |   |   |     |   |   |     |   |   |   |   |   |   |   |   |   |   |   |   |   |   |   |   |     |   |   |     |
| rat       |     | PI   | IGS  | PSS   | KRR  | SPSL  | QPI   | IE    | GETA   | SFF   | KEI   | IK    | ----  | QEE   | GSE  | DD   | SST  | KPDF   | FTV   | TL     | KTD  | SS  |      |     |     |     |   |   |     |   |   |     |   |   |   |   |   |   |   |   |   |   |   |   |   |   |   |   |     |   |   |     |
| human     |     | PI   | IGS  | PSS   | KRR  | SP    | LLQ   | PI    | IE     | GETA  | SFF   | KEI   | IK    | ----  | EEG  | SE   | DD   | SNV    | KPDF  | FM     | VT   | LK  | DFS  |     |     |     |   |   |     |   |   |     |   |   |   |   |   |   |   |   |   |   |   |   |   |   |   |   |     |   |   |     |
| chicken   |     | PI   | IGS  | PSS   | KRR  | SP    | LLQ   | PI    | IE     | GETA  | SFF   | KEI   | IK    | ----  | EEG  | SE   | ED   | SNV    | KPDF  | TIT    | MK   | TDF | N    |     |     |     |   |   |     |   |   |     |   |   |   |   |   |   |   |   |   |   |   |   |   |   |   |   |     |   |   |     |
| xenopus   |     | PV   | IGS  | PSS   | KRR  | SP    | LLQ   | PI    | IE     | GETA  | SFF   | KEV   | KE    | TL    | PEE  | E    | G    | SE     | DD    | TNG    | NTD  | FTV | TM   | KPG |     |     |   |   |     |   |   |     |   |   |   |   |   |   |   |   |   |   |   |   |   |   |   |   |     |   |   |     |
| zebrafish |     | PV   | IGS  | PSS   | KRR  | SP    | LLQ   | PI    | IE     | G     | V     | P     | A     | L     | F    | F    | S    | D      | T     | K      | ---- | E   | E    | D   | G   | S   |   |   |     |   |   |     |   |   |   |   |   |   |   |   |   |   |   |   |   |   |   |   |     |   |   |     |
| mouse     | 578 | AHC  | FLD  | Q     | LEDD | DAD   | GFI   | SP    | MDD    | KM    | PSK   | CS    | QDS   | GLS   | NL   | HS   | AS   | IPEL   | LEY   | LQ     | EM   | REE | K    | M   | IRK | 637 |   |   |     |   |   |     |   |   |   |   |   |   |   |   |   |   |   |   |   |   |   |   |     |   |   |     |
| rat       |     | AHC  | FLD  | Q     | LEDD | DAD   | GFI   | SP    | MDD    | KM    | PSK   | CS    | QDS   | GLS   | NL   | HS   | AS   | IPEL   | LEY   | LQ     | E    | I   | REE  | K   | M   | IRK |   |   |     |   |   |     |   |   |   |   |   |   |   |   |   |   |   |   |   |   |   |   |     |   |   |     |
| human     |     | ARC  | FLD  | Q     | FEDD | DAD   | GFI   | SP    | MDD    | KI    | PSK   | CS    | QDT   | GLS   | NL   | HA   | AS   | IPEL   | LE    | HL     | LQ   | EM  | REE  | K   | R   | IRK |   |   |     |   |   |     |   |   |   |   |   |   |   |   |   |   |   |   |   |   |   |   |     |   |   |     |
| chicken   |     | VRS  | FLD  | Q     | LEDD | DAD   | GFV   | SP    | VDD    | KI    | PS    | RSN   | QDM   | GLS   | NL   | HE   | AS   | IPEL   | LE    | QL     | Q    | EV  | REE  | K   | R   | IRK |   |   |     |   |   |     |   |   |   |   |   |   |   |   |   |   |   |   |   |   |   |   |     |   |   |     |
| xenopus   |     | VRT  | F    | L     | E    | Q     | LDD   | DAD   | GFV    | SP    | VDD   | N     | I     | PSK   | S    | S    | QD   | L      | GL    | NL     | HS   | AS  | IPEL | LE  | Q   | LQ  | E | A | REE | K | R | IRK |   |   |   |   |   |   |   |   |   |   |   |   |   |   |   |   |     |   |   |     |
| zebrafish |     | ML   | GL   | L     | D    | Q     | L     | D     | E      | D     | A     | D     | G     | F     | I    | S    | P    | V      | D     | E      | L    | S   | P    | S   | K   | N   | T | D | M   | R | L | S   | N | L | H | A | A | T | M | Q | E | L | V | E | L | Q | E | A | REE | K | R | IRK |

## Supplemental figure 2

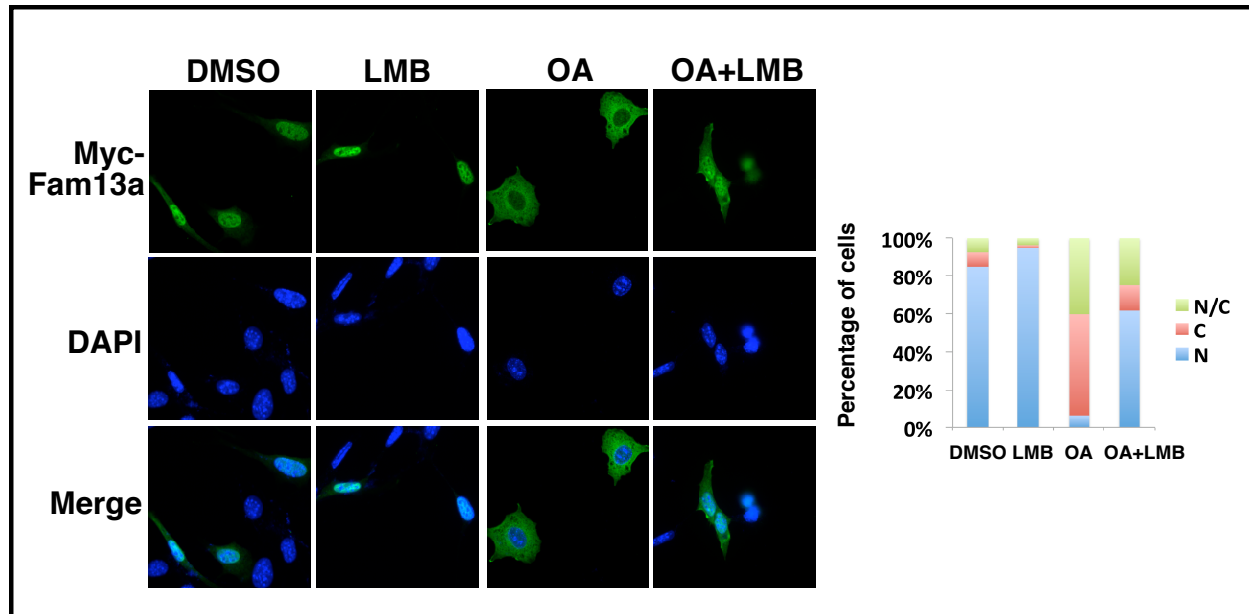

# Supplemental figure 3

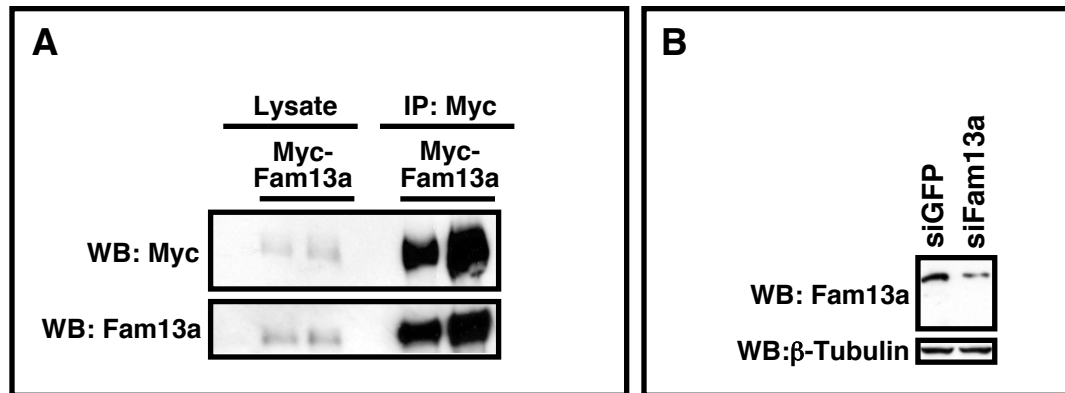

Supplemental figure 4

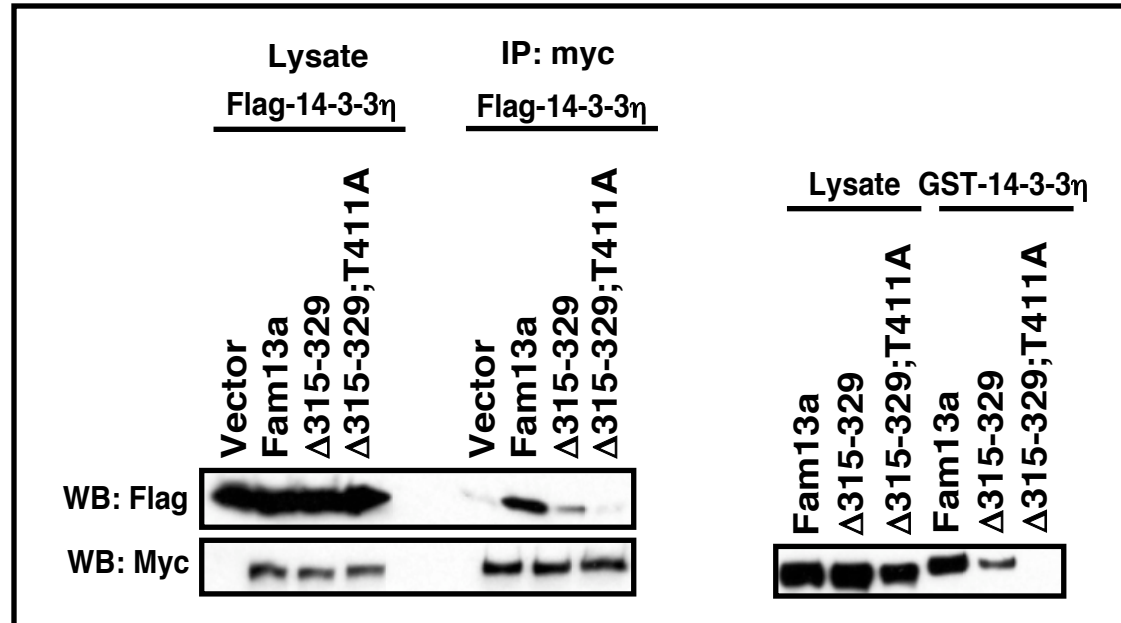

Supplement: supp_E14-08-1276v1_CombinedSupMats.pdf [file supp_E14-08-1276v1_CombinedSupMats.pdf]
